# Supplementary material
Source: publisher site journal article supplement (https://www.dovepress.com/article/447487)
Supplement: Supplementary file 1 [file get_supplementary_file.php]

**Appendix**

**Survey questions**

**Frequency of use of virtual companionship**

What is your frequency of use of virtual companions?

AI generated text

(Never, less than once a week, once to twice a week, three to six times a week, once a day, multiple times a day)

AI generates voice

(Never, less than once a week, once to twice a week, three to six times a week, once a day, multiple times a day)

**Emotional expression 47**

**To what extent do you agree with the following statement (1 = Strongly Disagree and 5 = Strongly Agree. R = Reverse-coded)**

1. What I’m feeling is written all over my face.

2. I am an emotionally expressive person.

3. I experience my emotions very strongly.

4. Whenever I feel negative emotions, people can easily see exactly what I am feeling.

5. I have strong emotions.

6. Whenever I feel positive emotions, people can easily see exactly what I am feeling.

7. I am sometimes unable to hide my feelings even though I would like to.

8. There have been times when I have not been able to stop crying even though I tried to stop.

9. When I’m happy, my feelings show.

10. My body reacts very strongly to emotional situations.

11. I sometimes cry during sad movies.

12. It is difficult for me to hide my fear.

13. No matter how nervous or upset I am, I tend to keep a calm exterior (R).

14. People often do not know what I am feeling (R).

15. I laugh out loud when someone tells me a joke that I think is funny.

16. I’ve learned it is better to suppress my anger than to show it (R).

**Note:** Reprinted from Personality and Individual Differences, 19/4, James J. Gross, Oliver P. John, Facets of emotional Expressivity: Three self-report factors and their correlates, 555-568, Copyright 1995, with permission from Elsevier.47

**Social anxiety**

**Online social anxiety** **45**

**When participating in online activities, to what extent do you agree with the following statements? (1 = Never and 5 = Always)**

1. I feel anxious about the impression I make during online interactions.

2. I worry about being mocked or ridiculed based on the content I share online.

3. I'm concerned that what I post online will be negatively judged or not well-received.

4. I'm apprehensive that close online friends might disapprove of my online behavior.

5. I'd feel uncomfortable if my online friends publicly expressed their dislike of the content I've shared.

6. I worry about negative feedback or disapproval from others when I post online.

7. When sharing online, I'm anxious about being judged by my friends, especially when others are viewing.

8. The idea of someone accessing my private online data makes me anxious.

9. I worry about my personal information being shared or exposed online without my permission.

10. It unsettles me when online friends share my private information with strangers.

11. Unauthorized access to my online personal space or profile concerns me greatly.

12. I'm anxious about how online platforms or social media companies handle the privacy of my data.

13. Interacting with strangers online makes me feel anxious.

14. Engaging in online conversations with people I barely know makes me nervous.

15. Initiating or forming new online friendships can be a source of unease for me.

16. I feel apprehensive when joining a new online community or group for the first time.

17. The thought of online social interaction sometimes intimidates me.

18. Discussing personal topics in online chats or forums makes me feel uneasy.

19. I'm anxious about the potential of leaving a negative impression during online interactions.

20. I'm concerned that people might have a low opinion of me based on my online presence.

21. Meeting others' online expectations is a source of anxiety for me.

**Note:** Reprinted from Computers in Human Behavior, 72, Yunus Alkis, Zafer Kadirhan, Mustafa Sat, Development and Validation of Social Anxiety Scale for Social Media Users, 296-303, Copyright 2017, with permission from Elsevier.45

**Offline social anxiety 46**

**When participating in offline activities, to what extent do you agree with the following statements? (1 = Never and 5 = Always)**

1. I get nervous if I have to speak with someone in authority (teacher, etc.)

2. I have difficulty making eye-contact with others.

3. I become tense if I have to talk about myself or my feelings.

4. I find difficulty mixing comfortably with the people I work with.

5. I tense-up if I meet an acquaintance in the street.

6. When mixing socially I am uncomfortable.

7. I feel tense if I am alone with just one other person.

8. I am at ease meeting people at parties, etc.

9. I have difficulty talking with other people.

10. I find it easy to think of things to talk about.

11. I worry about expressing myself in case I appear awkward.

12. I find it difficult to disagree with another's point of view.

13. I have difficulty talking to attractive persons of the opposite sex.

14. I find myself worrying that I won't know what to say in social situations.

15. I am nervous mixing with people I don't know well.

16. I feel I'll say something embarrassing when talking.

17. When mixing in a group I find myself worrying I will be ignored.

18. I am tense mixing in a group.

19. I am unsure whether to greet someone I know only slightly.

**Note:** Reprinted from Behaviour Research and Therapy, 36/4, Richard P. Mattick, J.Christopher Clarke, Development and validation of measures ofsocial phobia scrutiny fear and socialinteraction anxiety, 455-470, Copyright 1998, with permission from Elsevier.46

**Mindfulness 48**

**Please indicate how frequently each statement applies to you using the scale below: (1 = Never and 5 = Always)**

1. I could be experiencing some emotion and not be conscious of it until some time later.

2. I break or spill things because of carelessness, not paying attention, or thinking of something else.

3. I find it difficult to stay focused on what’s happening in the present.

4. I tend to walk quickly to get where I’m going without paying attention to what I experience along the way.

5. I tend not to notice feelings of physical tension or discomfort until they really grab my attention.

6. I forget a person’s name almost as soon as I’ve been told it for the first time.

7. It seems I am “running on automatic” without much awareness of what I’m doing.

8. I rush through activities without being really attentive to them.

9. I get so focused on the goal I want to achieve that I lose touch with what I am doing right now to get there.

10. I do jobs or tasks automatically, without being aware of what I’m doing.

11. I find myself listening to someone with one ear, doing something else at the same time.

12. I drive places on “automatic pilot” and then wonder why I went there.

13. I find myself preoccupied with the future or the past.

14. I find myself doing things without paying attention.

15. I snack without being aware that I’m eating.

Note: Copyright © 2003 by American Psychological Association. Reproduced with permission. Brown KW, Ryan RM. The benefits of being present: mindfulness and its role in psychological well-being. J Pers Soc Psychol. 2003;84:822–848.48
